# Supplementary material for: The Comprehensive Analysis Illustrates the Role of CDCA5 in Breast Cancer: An Effective Diagnosis and Prognosis Biomarker
Source: Hindawi journal article supplement (doi:10.1155/2023/7150141), 2023-05-30

# Supplementary file

## Figure S1

Kruskal-Wallis test  $p=2.8e-85$

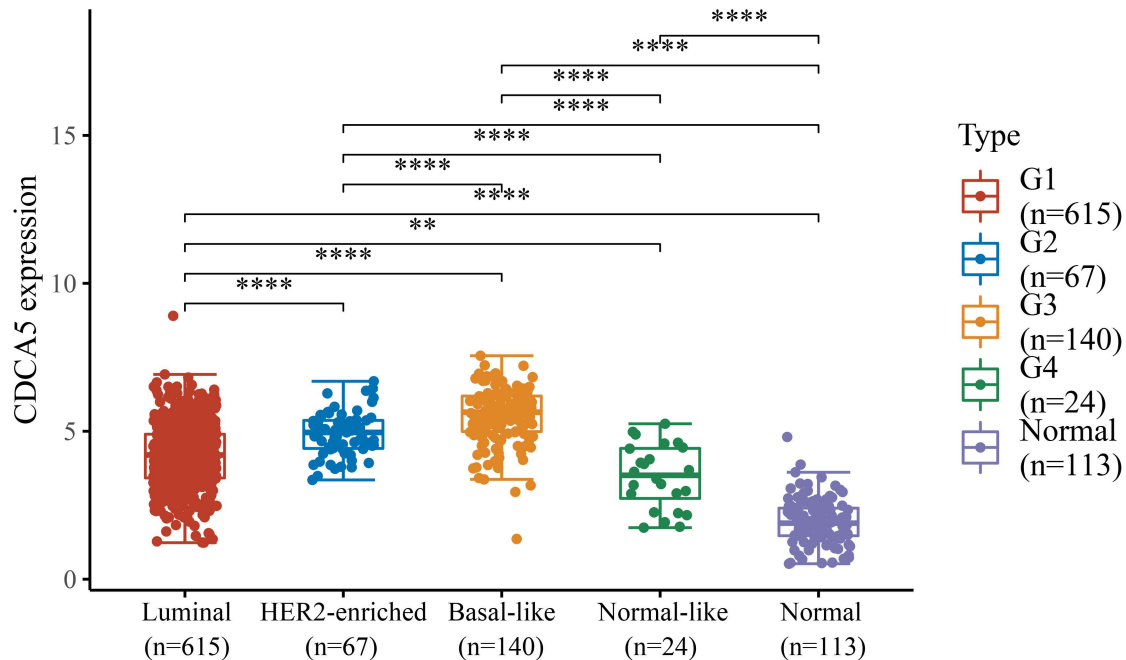

Figure S2

A

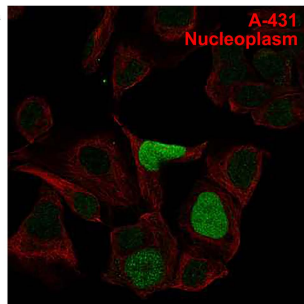

B

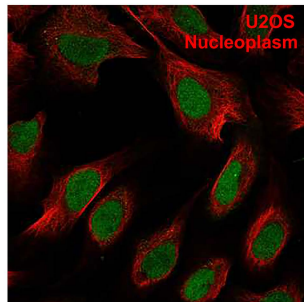

C

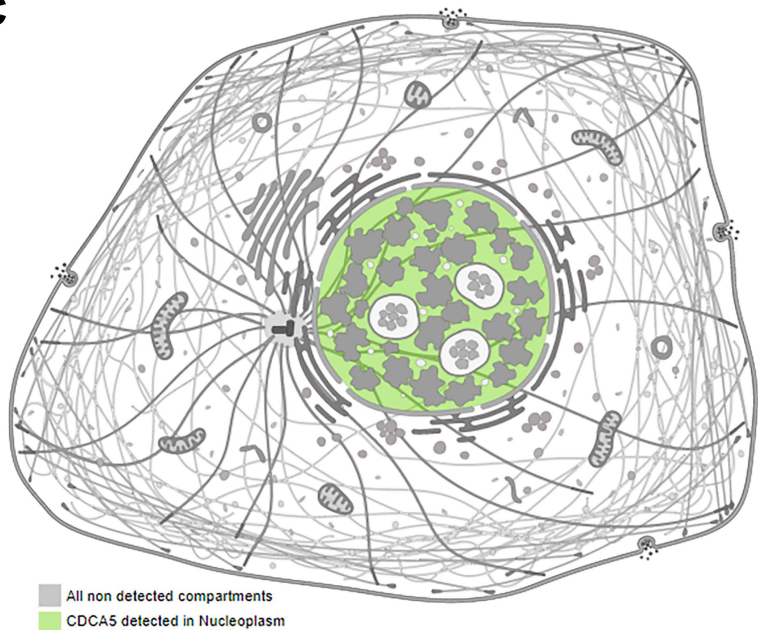

# Figure S3

## A

BRCA\_EMTAB8107

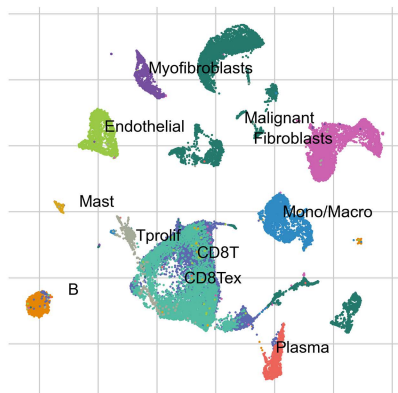

Celltype (major-lineage)

- B
- CD8T
- CD8Tex
- Endothelial
- Fibroblasts
- Malignant
- Mast
- Mono/Macro
- Myofibroblasts
- Plasma
- Tprolif

CDCA5

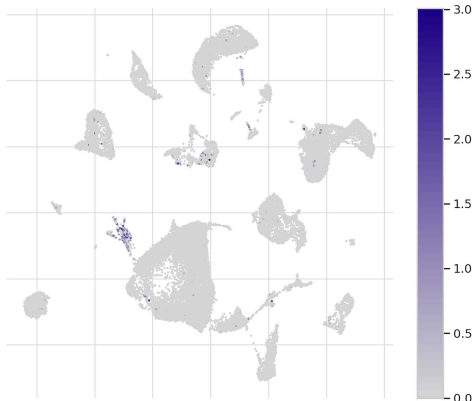

## B

BRCA\_GSE114727\_inDrop

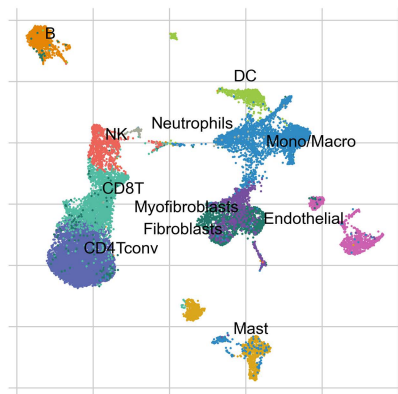

Celltype (major-lineage)

- B
- CD4Tconv
- CD8T
- DC
- Endothelial
- Fibroblasts
- Mast
- Mono/Macro
- Myofibroblasts
- NK
- Neutrophils

CDCA5

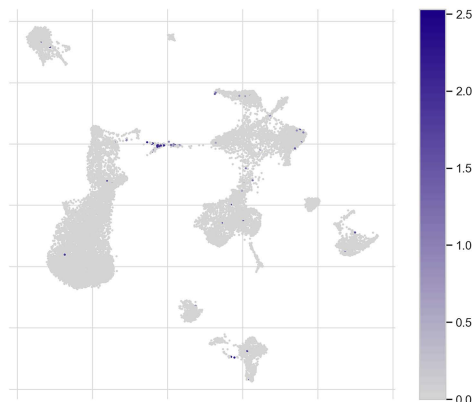

## C

BRCA\_Alex

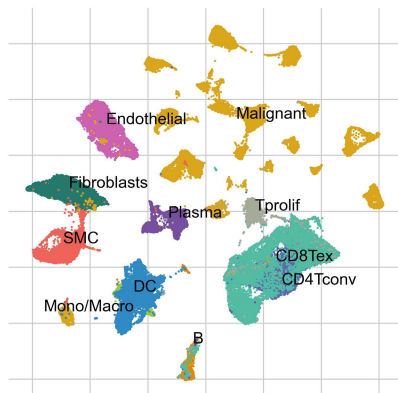

Celltype (major-lineage)

- B
- CD4Tconv
- CD8Tex
- DC
- Endothelial
- Fibroblasts
- Malignant
- Mono/Macro
- Plasma
- SMC
- Tprolif

CDCA5

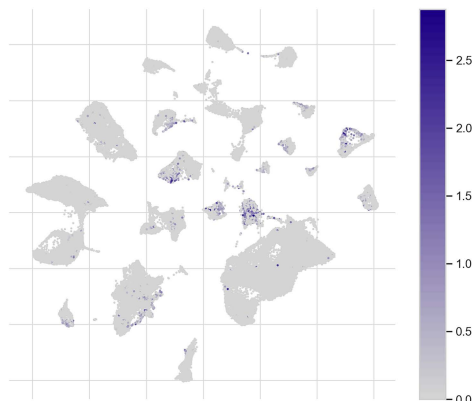

Supplement: f1 [file 7150141.f1.pdf]
